# Supplementary material for: QAPgrid: A Two Level QAP-Based Approach for Large-Scale Data Analysis and Visualization
Source: PubMed Central journal article supplement (PMC3022583; doi:10.1371/journal.pone.0014468), 2011-01-18

### CLUSTER 34

- Response to oxidative stress.

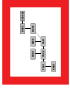

### CLUSTER 3

- Monosaccharide transport.  
- Hexose transport.

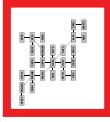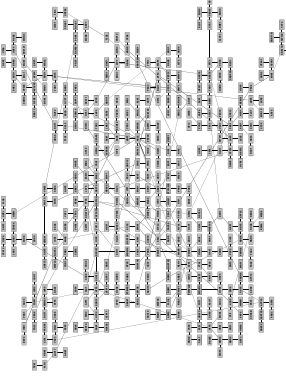

### CLUSTER 28

- SRP-dependent cotranslational protein targetin to membrane, translocation.  
- Protein refolding.

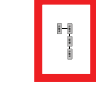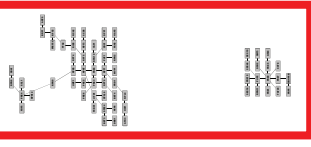

### CLUSTERS 14, 18

- Proteolysis  
- Biopolymer catabolic process.

### CLUSTER 1

- Cellular homeostasis.  
- Regulation of cellular pH.

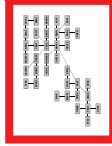

### CLUSTERS 39, 35, 42

- Translation.

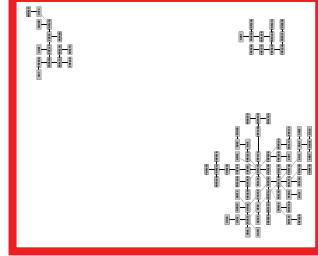

### CLUSTER 0

- M phase.  
- Mitotic Sister Chromatid segregation.

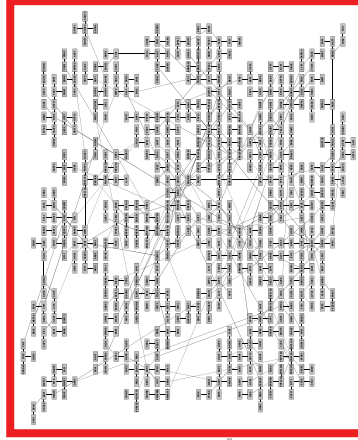

### CLUSTER 46

- Pre-replicative complex assembly.  
- S phase of mitotic cell cycle.

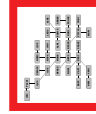

### CLUSTER 44

- Branched chain family amino acid biosynthetic/metabolic process.

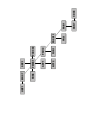

### CLUSTER 47

- Cytokinesis  
- Cell division.

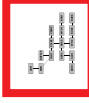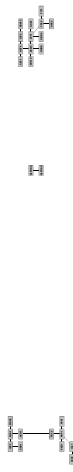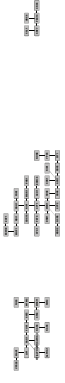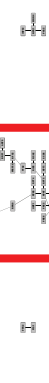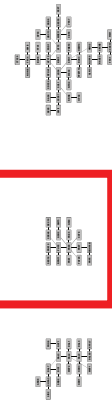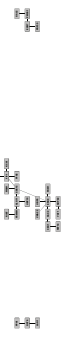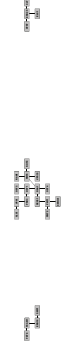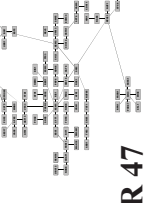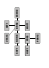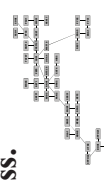

### CLUSTER 24

- Cellular carbohydrate metabolic process.
- Gluconeogenesis.

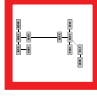

### CLUSTER 19

- Translation.
- Carbohydrate transport.

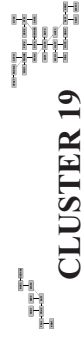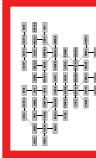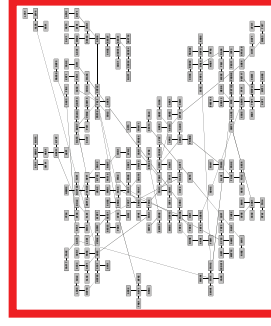

### CLUSTER 25

- Glycolysis.
- Glucose catabolic process

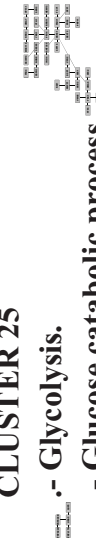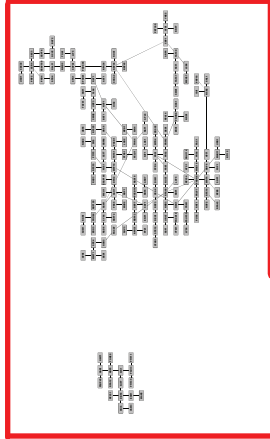

### CLUSTER 43,32,44

- Ribonucleoprotein complex biogenesis and assembly

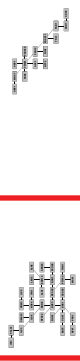

### CLUSTER 15

- Regulation of cyclin-dependent protein kinase activity.

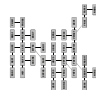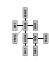

### CLUSTER 13

- Energy coupled proton transport, down electrochemical gradient.
- Ribonucleoside triphosphate biosynthetic process.

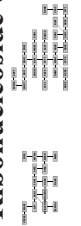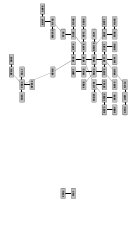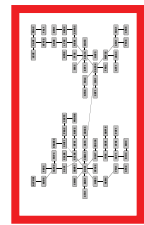

### CLUSTER 5

- Regulation of nucleobase, nucleoside, nucleotide and nucleic acid metabolic process.

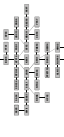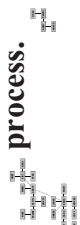

### CLUSTER 31

- Ergosterol biosynthetic process.

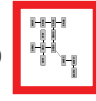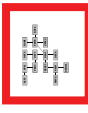

### CLUSTER 16

- Biopolymer glycosylation.

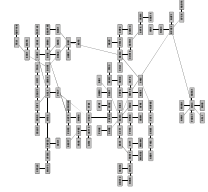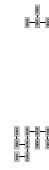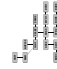

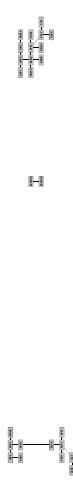

### CLUSTER 20

- Response to pheromone.
- Conjugation with cellular fusion.

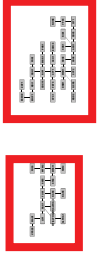

### CLUSTER 12

- Aerobic respiration.
- acetyl-CoA metabolic process.

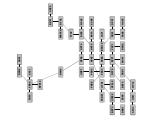

### CLUSTER 21

- Translation.

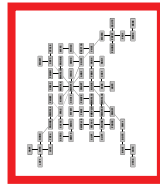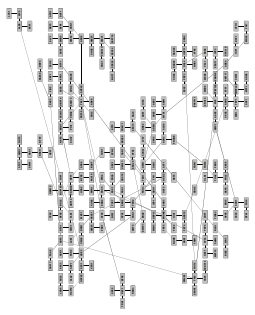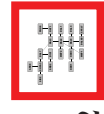

### CLUSTER 22

- Allantoin metabolic process.
- Nitrogen compound metabolic process.

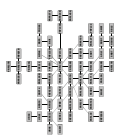

### CLUSTER 32

- RNA metabolic process.
- Purine salvage.

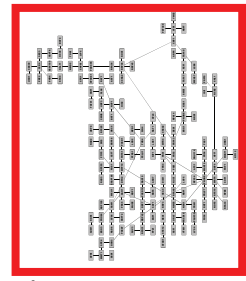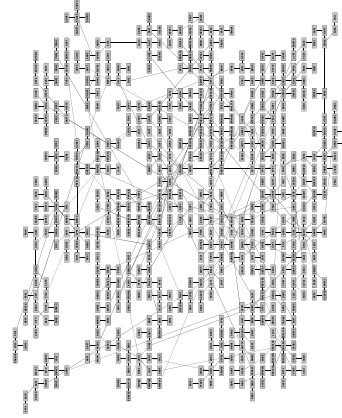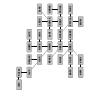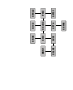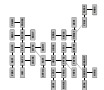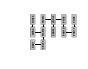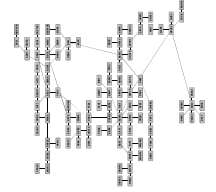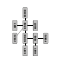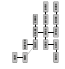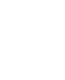

Supplement: pone.0014468.s005.pdf [file pone.0014468.s005.pdf]
