# Supplementary material for: QAPgrid: A Two Level QAP-Based Approach for Large-Scale Data Analysis and Visualization
Source: PubMed Central journal article supplement (PMC3022583; doi:10.1371/journal.pone.0014468), 2011-01-18
Supplement: pone.0014468.s001.pdf [file pone.0014468.s001.pdf]

## 1 The Memetic algorithm for the Quadratic Assignment Problem

2 The Memetic Algorithm (MA) implemented is presented in Figure 1. In each generation, the algo-  
 3 rithm applies the operators: **selectParents**, **recombination**, and two local search strategies (**swapTS**  
 4 and **8-neighborLS**). Additionally, the algorithm uses an update procedure (**updatePop**), to keep the  
 5 characteristics of the population structure which is explained later. The MA runs for a certain number  
 6 of generations (*max\_number\_of\_generations*), which can be either fixed or it can depend on the size of  
 7 instance and/or the convergence of the algorithm. Extra strategies are applied to deal with premature  
 8 convergence. Next, we describe each of the components of the MA implemented in more details.

### 9 Solution representation

10 The solution is represented as an array of integers of size  $n$ . Each position of the array stores the location  
 11 of an object, so,  $S(i) = k$  means that object  $i$  is assigned to location  $k$  ( $1 \leq i \leq n, 1 \leq k \leq m$ ).

### 12 Population structure

13 The population is structured as a ternary hierarchical tree composed of 13 agents as shown in Figure  
 14 2. This structure was first employed by Carrizo, Tinetti and Moscato [1] and it has been successfully  
 15 used in different applications [2–4]. The structure also defines four overlapped subpopulations, each one  
 16 consisting of a *leader* agent and three *supporter* ones, as shown in Figure 2 using dashed lines. The  
 17 **updatePop** procedure guarantees that the leader agent of a subpopulation always has the best solution  
 18 in that subpopulation. As a consequence, the best solution found in the end of each generation will be  
 19 in  $agent^0$  (leader agent of  $supop^0$ ).

20 Each agent consists of a list of  $P$  solutions that are *good quality* and *sufficiently diverse*. In order to  
 21 ensure these characteristics, the list of solutions in each  $agent^i$  is updated as follows. Let  $agent_j^i$  represent  
 22 the solution  $S_j$  in the agent  $i$  and  $d(S_1, S_2)$  the distance between solutions  $S_1$  and  $S_2$  defined by

$$d(S_1, S_2) = |\{i \in \{1, \dots, n\} \mid S_1(i) \neq S_2(i)\}| \quad (1)$$

23 First, we say that an agent is *complete* if its list of solutions is full. On the contrary, an agent is not  
 24 complete. Let  $agent_{best}^i$  and  $agent_{worst}^i$  represent the solution with the best and worst cost respectively,  
 25 in the list of solutions of  $agent^i$ . The **updateAgent**( $S, i$ ) in the algorithm in Figure 1, will add the  
 26 solution  $S$  in  $agent^i$  if any of the following conditions apply:

- 27 1.  $agent^i$  is not complete  $\wedge d(S, agent_k^i) \geq 0.1n, \forall k$ .
- 28 2.  $agent^i$  is not complete  $\wedge \exists k/d(S, agent_k^i) < 0.1n \wedge Cost(S) < Cost(agent_{best}^i)$ . Then  $S$  will replace  
 29  $agent_k^i / d(S, agent_k^i)$  is minimum,  $\forall k$ .
- 30 3.  $agent^i$  is complete  $\wedge Cost(S) < Cost(agent_{best}^i)$ . Then  $S$  will replace  $agent_k^i / d(S, agent_k^i)$  is  
 31 minimum,  $\forall k$ .
- 32 4.  $agent^i$  is complete  $\wedge Cost(S) \geq Cost(agent_{best}^i) \wedge d(S, agent_k^i) \geq 0.1n, \forall k \wedge Cost(S) < Cost(agent_{worst}^i)$ .  
 33 Then  $S$  will replace  $agent_{worst}^i$ .

34 When the list is not complete, conditions 1 and 2 decide to add a new solution if it is sufficiently  
 35 diverse or it is better than the best solution in the list. When the list is complete, conditions 3 and 4  
 36 also check if the new solution is better than the best one or it is sufficiently diverse, but there exists an  
 37 additional condition to decide which solution will be replaced.

### 38 Initial population

39 Each agent in the initial population is initialized with only one solution. Each solution is constructed  
 40 by assigning each object to a randomly chosen location. Afterwards, the local search **swapTS**, which is  
 41 described later, is applied. Finally, when we have 13 feasible solutions (one in each agent), the procedure  
 42 **updatePop** is applied. This process allows us to start our MA with a population composed of local  
 43 minima solutions.

### 44 Parents selection

45 Our MA restricts the selection of the parents to be recombined based on the tree structure. Figure 3  
 46 shows the pseudo-code of the procedure **selectParents**. The parameter  $i$  refers to agents 1 to 12 and  
 47 the variable  $k$  represents the leader agent of the agent  $i$  in the tree structure. For example, if  $i = 1, 2$   
 48 or 3, then  $k = 0$ ; if  $i = 4, 5$  or 6, then  $k = 1$ , and so on. For each  $i$ , the  $parent_1$  is a solution selected  
 49 uniformly at random from the pool of solutions of  $agent^i$ . The selection of  $parent_2$  will depend on the  
 50 diversity of the  $subpop^k$ . We say that a subpopulation is diverse (heterogeneous), if the supporters of  
 51 the subpopulation have less than 20% of the objects on the same location, else it will be declared to be  
 52 “no diverse” (homogeneous). In the first case,  $parent_2$  is chosen uniformly at random from the pool of  
 53 solutions of  $agent^k$ . On the contrary, if the subpopulation is homogeneous,  $parent_2$  is randomly chosen  
 54 from an  $agent^j$ , such that the subpopulation of  $agent^j$  is not  $k$ . For example, if  $i = 4$  and  $subpop^1$  ( $k = 1$ )  
 55 is homogeneous, then  $parent_2$  will be randomly chosen from  $agent^j$ , such that  $j \in \{7, 8, 9, 10, 11, 12\}$ ,  
 56 since  $\{4, 5, 6\}$  belong to  $subpop^1$ . On the contrary, if  $subpop^1$  ( $k = 1$ ) has **not** lost diversity, then  $parent_2$   
 57 will be chosen randomly from the  $agent^1$ .

### 58 Recombination operator

59 We use a modified version of the *cycle crossover* also used by Merz and Freisleben [5]. The operator aims  
 60 to produce an offspring with no extra mutation from the parents (an information-preserving crossover),  
 61 which means that each position in the offspring comes from one of the parents. The original cycle crossover  
 62 was designed to be used in QAP instances with  $n = m$ . When we use it on an instance with  $n < m$ , an  
 63 object can be left without a location. To explain the recombination operator, we use the example shown  
 64 in Figure 4.

65 Initially, all the objects with the same location in both parents are copied to the offspring (objects **A**  
 66 and **E**). Then, the algorithm randomly selects an unassigned object from the offspring, say object **D**, and  
 67 looks at its location in one of the parents, say Parent 2. Thus, the recombination assigns location #3 to  
 68 element **D**. Next, we look at the location of **D** in Parent 1 (i.e. location #1) and check which object is  
 69 in location #1 in Parent 2 (i.e. object **G**), assigning its location to the offspring (i.e. object **G** goes to  
 70 location #1). The process is repeated, now checking the location of object **G** in Parent 1 (location #4).  
 71 However, as location #4 is not present in Parent 2, the process stops. We repeat the process starting  
 72 with object **H** in parent 1. After processing all the objects in the offspring, object **B** still does not have  
 73 a location because both locations #3 and #12 have already been taken. This situation does not happen  
 74 when  $n = m$ . To deal with this problem, for each of the unassigned objects we trace a straight line  
 75 between the location of object **B** in both parents (locations #3 and #12) and choose a random location  
 76 over it, in this case location #6. It can also be the case that all the locations in that line are already  
 77 taken. In that situation the algorithm randomly selects an unassigned location from any of the parents.

### 78 Tabu Search

79 *Tabu Search* (TS) [6] is a metaheuristic that uses memory structures to avoid a local search strategy  
 80 to be trapped in a local minima. The inclusion of Tabu Search in the local search strategy in the

81 Memetic Algorithm (first proposed by Moscato [7]) has consistently shown very good results in different  
 82 applications [2, 7, 8] and its has been chosen due to the proved synergy within this population-based  
 83 approach.

84 We use a basic TS algorithm to enhance the *pairwise interchange heuristic* (**swapTS** in the MA  
 85 algorithm of Figure 1). In the pairwise interchange heuristic, the neighborhood of a solution,  $N(S)$ ,  
 86 corresponds to the set of all new solutions produced by the swap of the locations of two different objects,  
 87 i.e,  $S(i) = k$  is swapped with  $S(i') = k'$ , producing  $S(i) = k'$  and  $S(i') = k$ . In each iteration, the best  
 88 solution from the neighborhood  $N(S)$  is selected. For the TS version, after swap  $S(i) = k$  with  $S(i') = k'$ ,  
 89 the objects  $i$  and  $i'$  are forbidden to return to the locations  $k$  and  $k'$ , respectively, for a certain number  
 90 of iterations (*tabu tenure*). However, if the swap improves the value of the objective function of the best  
 91 solution found so far, then it is allowed (*aspiration criteria*). The process is repeated until there is no  
 92 improvement for a fixed number of iterations.

93 The tabu tenure is an integer value that is randomly generated from an interval  $[T_1, T_2]$  after each  
 94 swap is performed.

## 95 **8-neighbor local search**

96 The second local search that the MA uses is the greedy algorithm called **8-neighborLS**. This local search  
 97 aims at exploring the repository of objects to contiguous locations in the grid. Due to the representation  
 98 used, a solution only considers the locations that are already assigned, so the operators do not allow the  
 99 algorithm to fully explore all locations of the grid.

100 This local search is applied once per generation on the best solution of the population and only if  
 101  $n < m$  (the number of objects is smaller than the number of locations). On the contrary, if  $n = m$ , there  
 102 is no need to use it, since we are already using the whole set of grid locations available.

103 The algorithm works as follows: for each object  $i$ , the algorithm tests if moving the selected object  
 104 to one of its 8 contiguous locations in the grid improves the quality of the solution. In case it does, the  
 105 object is moved and the process is repeated again, until no further improvement can be obtained moving  
 106 that object. The same process is repeated with each object.

## 107 **Diversification**

108 One of the problems that a designer of a population-based metaheuristic needs to address is the premature  
 109 convergence of the population [7]. This situation generally happens when the size of the population is  
 110 small, like in this case. In order to avoid this, two diversification strategies have been implemented.  
 111 The first one was already described previously, which aims to avoid convergence in a subpopulation by  
 112 selecting parents from different subpopulations to perform the recombination operator.

113 The second strategy is a mechanism that is triggered when the MA has been unable to find a better  
 114 solution during the last  $n/4$  generations. If that is the case, the whole population is restarted and only  
 115 the best solution from *agent*<sup>0</sup> is kept. This strategy aims to provide a new starting point for the MA,  
 116 without losing the best individual found so far.

## 117 **Some preliminary results**

118 The MA was coded in Java 1.6 and the computational tests were run on a PC with Intel Core 2 Duo CPU  
 119 (1.86 Ghz, 2GB RAM) running Solaris 10. We analyzed the performance of the MA using the instances  
 120 from the Quadratic Assignment Problem Library (QAPLIB) [9]. QAPLIB is a repository of instances of  
 121 the Quadratic Assignment Problem that can be used as a benchmark for new algorithms. The instances  
 122 considered have the same number of objects ( $n$ ) and number of locations ( $m$ ), and range from 25 to 256  
 123 objects.

124 We compared our MA with two other population-based metaheuristics. The first one was presented  
 125 by Demirel and Toksari [10]. It uses an Ant Colony System that implements a Simulated Annealing local  
 126 search (ACSA). The second one corresponds to a MA proposed by Merz and Freisleben [11] ( $MA_M$ ). The  
 127 algorithm uses the information-preserving crossover and a variant of the pairwise interchange heuristic on  
 128 an unstructured population of 40 individuals. Complementary, Merz and Freisleben in [5], compare the  
 129 MA against five competitors. We used the results from the later, since the results are better than [11].  
 130 In both algorithms (ACSA and  $MA_M$ ), the authors also use the instances taken from the QAPLIB [9].

131 In general, the MA proposed performed well compared with both competitors. In the case of ACSA,  
 132 our algorithm outperformed in all but two instances (*tai50a* and *tai80a*). The average gap is 0.115%,  
 133 compared to 0.382% of ACSA. In comparison with  $MA_M$  we also obtained a slight better average gap  
 134 (0.322% against 0.388%), but the difference is not so significant.

## 135 References

- 136 1. Carrizo J, Tinetti F, Moscato P (1992) A computational ecology for the quadratic assignment  
 137 problem. In: Proceedings of the 21st Meeting on Informatics and OR. Buenos Aires, Argentina,  
 138 August.
- 139 2. Berretta R, Moscato P (1999) The number partitioning problem: An open challenge for evolution-  
 140 ary computation? In: Corne D, Dorigo M, editors, New Ideas in Optimization, McGraw-Hill. pp.  
 141 261–278.
- 142 3. Berretta R, Rodrigues L (2004) A memetic algorithm for a multistage capacitated lot-sizing prob-  
 143 lem. Int J of Production Economics 87: 67–81.
- 144 4. Buriol L, Franca P, Moscato P (2004) A new memetic algorithm for the asymmetric traveling  
 145 salesman problem. J of Heuristics 10: 483–506.
- 146 5. Merz P, Freisleben B (2000) Fitness landscape analysis and memetic algorithms for the quadratic  
 147 assignment problem. IEEE Transactions on Evol Computation 4: 337–352.
- 148 6. Glover F, Laguna M (1997) Tabu Search. Norwell, Massachusetts: Kluwer Academic Publishers.
- 149 7. Moscato P (1993) An introduction to population approaches for optimization and hierarchical  
 150 objective functions: A discussion on the role of tabu search. Annals of OR 41: 85–121.
- 151 8. Moscato P, Mendes A, Berretta R (2007) Benchmarking a memetic algorithm for ordering microar-  
 152 ray data. Biosystems 88: 56–75.
- 153 9. Burkard R, Karisch S, Rendl F (1997) QAPLIB - a quadratic assignment problem library. J of  
 154 Global Optimization 10: 391–403.
- 155 10. Demirel N, Toksari M (2006) Optimization of the quadratic assignment problem using an ant  
 156 colony algorithm. Applied Mathematics and Computation 183: 427–435.
- 157 11. Merz P, Freisleben B (1999) A comparison of memetic algorithm, tabu search, and ant colonies  
 158 for the quadratic assignment problem. In: Angeline P, editor, Congress on Evol. Computation  
 159 (CEC'99). IEEE Press, pp. 2063–2070.

```
MA()
  pop = initializePop()
  REPEAT
    FOR i=1 TO 12
      selectParents(i, parent1, parent2)
      offspring = recombination(parent1, parent2)
      swapTS(offspring)
      updateAgent(offspring, i)
    END FOR
    updatePop(pop)
    IF (m > n) /*more locations than objects*/
      8-neighborLS(pop)
    END IF
    IF popConverged(pop)
      pop = restartPop(pop)
    END IF
  UNTIL max_number_of_generations
END
```

Figure 1. Pseudo-code of the Memetic Algorithm implemented for the Quadratic Assignment Problem.

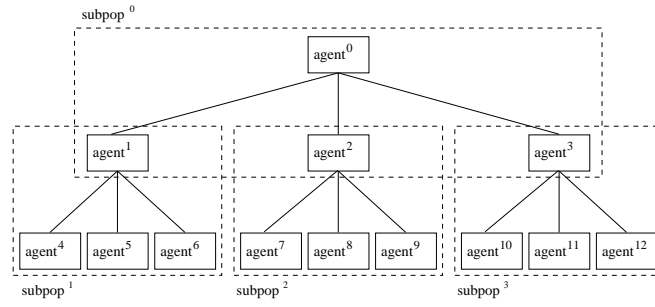

**Figure 2. Population structure used in our memetic algorithm.** It has been shown before that the use of population structures is a useful mechanism to bias the search process, and that accelerates the discovery of near-optimal solutions. We have used a hierarchical population composed of 13 agents which are organized in a complete ternary tree. The figure also indicates the subpopulations present in the structure.

```
selectParents(i,parent1,parent2)
  k = (i - 1)/3
  IF (lostDiversity(subpopk))
    j = U[4,12] / agentj ∉ subpopk
  ELSE
    j = (i - 1)/3
  END IF
  parent1 = randomIndividual(agenti)
  parent2 = randomIndividual(agentj)
END
```

**Figure 3.** Pseudo-code of the selectionParents procedure from the Memetic Algorithm showed in Figure 1.

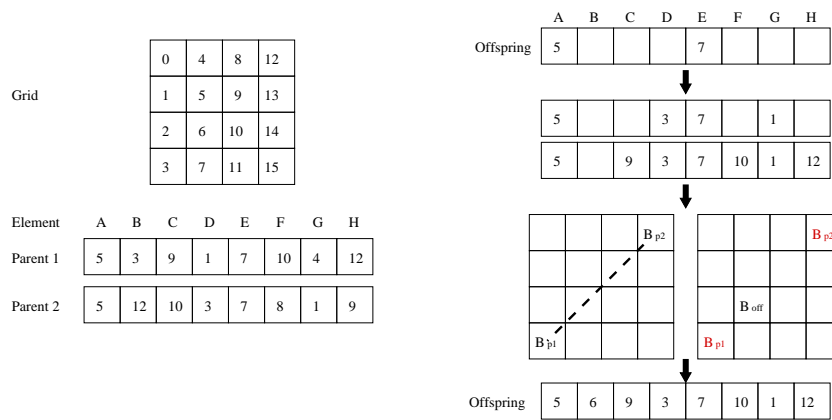

**Figure 4. Example of the modified cycle crossover operator for the memetic algorithm.** It solves the problem of unassigned objects of the original cycle crossover in the case when  $n < m$ .
