# Supplementary material for: QAPgrid: A Two Level QAP-Based Approach for Large-Scale Data Analysis and Visualization
Source: PubMed Central journal article supplement (PMC3022583; doi:10.1371/journal.pone.0014468), 2011-01-18
Supplement: pone.0014468.s004.pdf [file pone.0014468.s004.pdf]

## Gene Ontology analysis of genes for yeast data set

This file contains the details of the Gene Ontology Analysis performed on the genes of the yeast data set. For 31 out of 52 clusters the Gene Ontology Term Finder website<sup>1</sup> was able to find common biological process for the set of genes of the cluster. We consider only those terms with a significance  $P$ -value < 0.01. In order to help with the reading of the results, in Figure 1 we show the grid layout of the clusters resulting from the application of **QAPgrid** and the id of the cluster in each cell of the grid. Clusters in yellow did not report any common biological process.

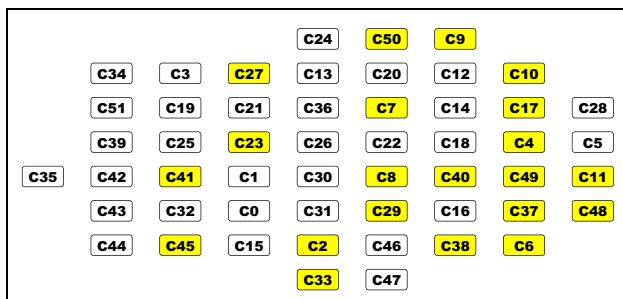

Figure 1: Grid layout of the clusters of genes of yeast. Cells in yellow do not have any common biological process reported by Gene Ontology Term Finder.

Table 1 shows the Gene Ontology terms related with the common biological process in which genes of a cluster are involved. The first column indicates the number of clusters that contain that term. For example the term *cell cycle process* in cluster 0 has a number two, which means that this term is present in two clusters (cluster 0 and cluster 47). The second and the third columns indicate the code and the name of the GO term, respectively. Columns **Cluster** and **Background** reflect how many genes are annotated to that GO term in the Cluster and in the total Background (the background used is the whole set of 2,467 genes). The last column shows the  $P$ -value of the term, we only searched for terms with a  $P$ -value < 0.01. For details on how the  $P$ -value is calculated, we refer to the website of the application.

<sup>1</sup><http://db.yeastgenome.org/cgi-bin/GO/goTermFinder.pl>

Table 1: Biological process of clusters of genes for the yeast data set according to the information provided by Gene Ontology Term Finder.

| Rep | GOID           | GO-term                                                                             | Frequency            |                       | P-value  |
|-----|----------------|-------------------------------------------------------------------------------------|----------------------|-----------------------|----------|
|     |                |                                                                                     | Cluster              | Background            |          |
|     | <b>Cluster</b> | 0                                                                                   |                      |                       |          |
| 1   | 279            | M phase                                                                             | 52/592 genes, 8.8%   | 105/2464 genes, 4.3%  | 4.84E-06 |
| 1   | 7049           | cell cycle                                                                          | 95/592 genes, 16.0%  | 241/2464 genes, 9.8%  | 1.24E-05 |
| 6   | 9059           | macromolecule biosynthetic process                                                  | 137/592 genes, 23.1% | 391/2464 genes, 15.9% | 4.39E-05 |
| 2   | 22402          | cell cycle process                                                                  | 83/592 genes, 14.0%  | 210/2464 genes, 8.5%  | 0.0001   |
| 1   | 70             | mitotic sister chromatid segregation                                                | 18/592 genes, 3.0%   | 24/2464 genes, 1.0%   | 0.00014  |
| 1   | 819            | sister chromatid segregation                                                        | 18/592 genes, 3.0%   | 24/2464 genes, 1.0%   | 0.00014  |
| 1   | 7059           | chromosome segregation                                                              | 25/592 genes, 4.2%   | 40/2464 genes, 1.6%   | 0.00017  |
| 1   | 6259           | DNA metabolic process                                                               | 89/592 genes, 15.0%  | 232/2464 genes, 9.4%  | 0.00018  |
| 1   | 7017           | microtubule-based process                                                           | 30/592 genes, 5.1%   | 54/2464 genes, 2.2%   | 0.0004   |
| 1   | 51276          | chromosome organization and biogenesis                                              | 115/592 genes, 19.4% | 327/2464 genes, 13.3% | 0.00058  |
| 1   | 6310           | DNA recombination                                                                   | 40/592 genes, 6.8%   | 83/2464 genes, 3.4%   | 0.00077  |
| 2   | 6260           | DNA replication                                                                     | 44/592 genes, 7.4%   | 96/2464 genes, 3.9%   | 0.00126  |
| 1   | 51321          | meiotic cell cycle                                                                  | 31/592 genes, 5.2%   | 59/2464 genes, 2.4%   | 0.00132  |
| 1   | 51327          | M phase of meiotic cell cycle                                                       | 31/592 genes, 5.2%   | 59/2464 genes, 2.4%   | 0.00132  |
| 1   | 7126           | meiosis                                                                             | 31/592 genes, 5.2%   | 59/2464 genes, 2.4%   | 0.00132  |
| 6   | 6412           | translation                                                                         | 102/592 genes, 17.2% | 293/2464 genes, 11.9% | 0.0049   |
| 1   | 22403          | cell cycle phase                                                                    | 67/592 genes, 11.3%  | 176/2464 genes, 7.1%  | 0.00923  |
|     | <b>Cluster</b> | 1                                                                                   |                      |                       |          |
| 1   | 19725          | cellular homeostasis                                                                | 9/37 genes, 24.3%    | 67/2464 genes, 2.7%   | 4.44E-05 |
| 1   | 42592          | homeostatic process                                                                 | 9/37 genes, 24.3%    | 69/2464 genes, 2.8%   | 5.77E-05 |
| 1   | 55082          | cellular chemical homeostasis                                                       | 8/37 genes, 21.6%    | 60/2464 genes, 2.4%   | 0.00024  |
| 1   | 6873           | cellular ion homeostasis                                                            | 8/37 genes, 21.6%    | 60/2464 genes, 2.4%   | 0.00024  |
| 1   | 48878          | chemical homeostasis                                                                | 8/37 genes, 21.6%    | 62/2464 genes, 2.5%   | 0.00031  |
| 1   | 50801          | ion homeostasis                                                                     | 8/37 genes, 21.6%    | 62/2464 genes, 2.5%   | 0.00031  |
| 1   | 30641          | regulation of cellular pH                                                           | 5/37 genes, 13.5%    | 16/2464 genes, 0.6%   | 0.00031  |
| 1   | 45851          | pH reduction                                                                        | 5/37 genes, 13.5%    | 16/2464 genes, 0.6%   | 0.00031  |
| 1   | 51452          | intracellular pH reduction                                                          | 5/37 genes, 13.5%    | 16/2464 genes, 0.6%   | 0.00031  |
| 1   | 51453          | regulation of intracellular pH                                                      | 5/37 genes, 13.5%    | 16/2464 genes, 0.6%   | 0.00031  |
| 1   | 7035           | vacuolar acidification                                                              | 5/37 genes, 13.5%    | 16/2464 genes, 0.6%   | 0.00031  |
| 1   | 6885           | regulation of pH                                                                    | 5/37 genes, 13.5%    | 18/2464 genes, 0.7%   | 0.0006   |
| 1   | 30003          | cellular cation homeostasis                                                         | 7/37 genes, 18.9%    | 55/2464 genes, 2.2%   | 0.0016   |
| 1   | 30004          | cellular monovalent inorganic cation homeostasis                                    | 5/37 genes, 13.5%    | 22/2464 genes, 0.9%   | 0.00176  |
| 1   | 55080          | cation homeostasis                                                                  | 7/37 genes, 18.9%    | 57/2464 genes, 2.3%   | 0.00203  |
| 2   | 45047          | protein targeting to ER                                                             | 5/37 genes, 13.5%    | 24/2464 genes, 1.0%   | 0.00278  |
| 1   | 55067          | monovalent inorganic cation homeostasis                                             | 5/37 genes, 13.5%    | 24/2464 genes, 1.0%   | 0.00278  |
| 1   | 7033           | vacuole organization and biogenesis                                                 | 6/37 genes, 16.2%    | 41/2464 genes, 1.7%   | 0.00321  |
|     | <b>Cluster</b> | 3                                                                                   |                      |                       |          |
| 1   | 15749          | monosaccharide transport                                                            | 5/26 genes, 19.2%    | 22/2464 genes, 0.9%   | 0.00025  |
| 1   | 8645           | hexose transport                                                                    | 5/26 genes, 19.2%    | 22/2464 genes, 0.9%   | 0.00025  |
| 2   | 8643           | carbohydrate transport                                                              | 5/26 genes, 19.2%    | 25/2464 genes, 1.0%   | 0.00049  |
|     | <b>Cluster</b> | 5                                                                                   |                      |                       |          |
| 1   | 19219          | regulation of nucleobase, nucleoside, nucleotide and nucleic acid metabolic process | 21/69 genes, 30.4%   | 295/2464 genes, 12.0% | 0.00728  |
|     | <b>Cluster</b> | 12                                                                                  |                      |                       |          |
| 2   | 6091           | generation of precursor metabolites and energy                                      | 17/29 genes, 58.6%   | 107/2464 genes, 4.3%  | 4.62E-15 |
| 1   | 9060           | aerobic respiration                                                                 | 14/29 genes, 48.3%   | 57/2464 genes, 2.3%   | 9.83E-15 |
| 1   | 45333          | cellular respiration                                                                | 14/29 genes, 48.3%   | 58/2464 genes, 2.4%   | 1.28E-14 |
| 1   | 51187          | cofactor catabolic process                                                          | 9/29 genes, 31.0%    | 16/2464 genes, 0.6%   | 8.49E-13 |
| 1   | 9109           | coenzyme catabolic process                                                          | 9/29 genes, 31.0%    | 16/2464 genes, 0.6%   | 8.49E-13 |
| 1   | 15980          | energy derivation by oxidation of organic compounds                                 | 14/29 genes, 48.3%   | 83/2464 genes, 3.4%   | 2.90E-12 |

It continues on next page

Table 1 – continued from previous page

| Rep | GOID           | GO-term                                                        | Frequency          |                        | P-value  |
|-----|----------------|----------------------------------------------------------------|--------------------|------------------------|----------|
|     |                |                                                                | Cluster            | Background             |          |
| 1   | 6084           | acetyl-CoA metabolic process                                   | 9/29 genes, 31.0%  | 20/2464 genes, 0.8%    | 1.21E-11 |
| 1   | 46356          | acetyl-CoA catabolic process                                   | 8/29 genes, 27.6%  | 15/2464 genes, 0.6%    | 5.57E-11 |
| 1   | 6099           | tricarboxylic acid cycle                                       | 8/29 genes, 27.6%  | 15/2464 genes, 0.6%    | 5.57E-11 |
| 1   | 6118           | electron transport                                             | 9/29 genes, 31.0%  | 23/2464 genes, 0.9%    | 5.76E-11 |
| 1   | 42773          | ATP synthesis coupled electron transport                       | 8/29 genes, 27.6%  | 18/2464 genes, 0.7%    | 3.70E-10 |
| 1   | 42775          | organelle ATP synthesis coupled electron transport             | 8/29 genes, 27.6%  | 18/2464 genes, 0.7%    | 3.70E-10 |
| 1   | 51186          | cofactor metabolic process                                     | 12/29 genes, 41.4% | 91/2464 genes, 3.7%    | 6.83E-09 |
| 1   | 6732           | coenzyme metabolic process                                     | 11/29 genes, 37.9% | 70/2464 genes, 2.8%    | 7.14E-09 |
| 2   | 6119           | oxidative phosphorylation                                      | 8/29 genes, 27.6%  | 30/2464 genes, 1.2%    | 4.52E-08 |
| 1   | 6121           | mitochondrial electron transport, succinate to ubiquinone      | 4/29 genes, 13.8%  | 4/2464 genes, 0.2%     | 1.10E-06 |
| 1   | 16310          | phosphorylation                                                | 8/29 genes, 27.6%  | 74/2464 genes, 3.0%    | 8.29E-05 |
| 1   | 6793           | phosphorus metabolic process                                   | 8/29 genes, 27.6%  | 101/2464 genes, 4.1%   | 0.0009   |
| 1   | 6796           | phosphate metabolic process                                    | 8/29 genes, 27.6%  | 101/2464 genes, 4.1%   | 0.0009   |
| 1   | 6100           | tricarboxylic acid cycle intermediate metabolic process        | 4/29 genes, 13.8%  | 18/2464 genes, 0.7%    | 0.003    |
| 1   | 6122           | mitochondrial electron transport, ubiquinol to cytochrome c    | 3/29 genes, 10.3%  | 7/2464 genes, 0.3%     | 0.00353  |
|     | <b>Cluster</b> | <b>13</b>                                                      |                    |                        |          |
| 2   | 6119           | oxidative phosphorylation                                      | 22/427 genes, 5.2% | 30/2464 genes, 1.2%    | 1.14E-08 |
| 1   | 15985          | energy coupled proton transport, down electrochemical gradient | 12/427 genes, 2.8% | 12/2464 genes, 0.5%    | 4.51E-07 |
| 1   | 15986          | ATP synthesis coupled proton transport                         | 12/427 genes, 2.8% | 12/2464 genes, 0.5%    | 4.51E-07 |
| 1   | 46034          | ATP metabolic process                                          | 12/427 genes, 2.8% | 12/2464 genes, 0.5%    | 4.51E-07 |
| 1   | 6754           | ATP biosynthetic process                                       | 12/427 genes, 2.8% | 12/2464 genes, 0.5%    | 4.51E-07 |
| 1   | 9144           | purine nucleoside triphosphate metabolic process               | 12/427 genes, 2.8% | 13/2464 genes, 0.5%    | 4.95E-06 |
| 1   | 9145           | purine nucleoside triphosphate biosynthetic process            | 12/427 genes, 2.8% | 13/2464 genes, 0.5%    | 4.95E-06 |
| 1   | 9205           | purine ribonucleoside triphosphate metabolic process           | 12/427 genes, 2.8% | 13/2464 genes, 0.5%    | 4.95E-06 |
| 1   | 9206           | purine ribonucleoside triphosphate biosynthetic process        | 12/427 genes, 2.8% | 13/2464 genes, 0.5%    | 4.95E-06 |
| 1   | 9199           | ribonucleoside triphosphate metabolic process                  | 13/427 genes, 3.0% | 15/2464 genes, 0.6%    | 5.69E-06 |
| 1   | 9201           | ribonucleoside triphosphate biosynthetic process               | 13/427 genes, 3.0% | 15/2464 genes, 0.6%    | 5.69E-06 |
| 1   | 9142           | nucleoside triphosphate biosynthetic process                   | 14/427 genes, 3.3% | 18/2464 genes, 0.7%    | 1.98E-05 |
| 1   | 15992          | proton transport                                               | 12/427 genes, 2.8% | 15/2464 genes, 0.6%    | 0.00012  |
| 1   | 6818           | hydrogen transport                                             | 12/427 genes, 2.8% | 15/2464 genes, 0.6%    | 0.00012  |
| 1   | 9141           | nucleoside triphosphate metabolic process                      | 14/427 genes, 3.3% | 20/2464 genes, 0.8%    | 0.00018  |
| 2   | 6091           | generation of precursor metabolites and energy                 | 39/427 genes, 9.1% | 107/2464 genes, 4.3%   | 0.00067  |
| 1   | 6970           | response to osmotic stress                                     | 20/427 genes, 4.7% | 39/2464 genes, 1.6%    | 0.00074  |
| 1   | 15672          | monovalent inorganic cation transport                          | 12/427 genes, 2.8% | 19/2464 genes, 0.8%    | 0.00696  |
| 1   | 9628           | response to abiotic stimulus                                   | 23/427 genes, 5.4% | 55/2464 genes, 2.2%    | 0.00967  |
|     | <b>Cluster</b> | <b>14</b>                                                      |                    |                        |          |
| 2   | 6508           | proteolysis                                                    | 25/48 genes, 52.1% | 107/2464 genes, 4.3%   | 6.08E-21 |
| 2   | 19941          | modification-dependent protein catabolic process               | 23/48 genes, 47.9% | 93/2464 genes, 3.8%    | 1.43E-19 |
| 2   | 51603          | proteolysis involved in cellular protein catabolic process     | 23/48 genes, 47.9% | 93/2464 genes, 3.8%    | 1.43E-19 |
| 2   | 6511           | ubiquitin-dependent protein catabolic process                  | 23/48 genes, 47.9% | 93/2464 genes, 3.8%    | 1.43E-19 |
| 2   | 43632          | modification-dependent macromolecule catabolic process         | 23/48 genes, 47.9% | 96/2464 genes, 3.9%    | 3.20E-19 |
| 2   | 44257          | cellular protein catabolic process                             | 23/48 genes, 47.9% | 98/2464 genes, 4.0%    | 5.38E-19 |
| 2   | 30163          | protein catabolic process                                      | 23/48 genes, 47.9% | 104/2464 genes, 4.2%   | 2.36E-18 |
| 2   | 43285          | biopolymer catabolic process                                   | 25/48 genes, 52.1% | 168/2464 genes, 6.8%   | 8.65E-16 |
| 2   | 44265          | cellular macromolecule catabolic process                       | 25/48 genes, 52.1% | 182/2464 genes, 7.4%   | 6.50E-15 |
| 2   | 9057           | macromolecule catabolic process                                | 25/48 genes, 52.1% | 203/2464 genes, 8.2%   | 9.79E-14 |
| 3   | 44248          | cellular catabolic process                                     | 25/48 genes, 52.1% | 258/2464 genes, 10.5%  | 3.20E-11 |
| 3   | 9056           | catabolic process                                              | 25/48 genes, 52.1% | 264/2464 genes, 10.7%  | 5.51E-11 |
| 2   | 43283          | biopolymer metabolic process                                   | 39/48 genes, 81.2% | 1050/2464 genes, 42.6% | 3.22E-06 |
| 5   | 44260          | cellular macromolecule metabolic process                       | 31/48 genes, 64.6% | 786/2464 genes, 31.9%  | 0.00024  |
| 5   | 44267          | cellular protein metabolic process                             | 30/48 genes, 62.5% | 756/2464 genes, 30.7%  | 0.00038  |
| 5   | 19538          | protein metabolic process                                      | 30/48 genes, 62.5% | 781/2464 genes, 31.7%  | 0.00081  |

It continues on next page

Table 1 – continued from previous page

| Rep | GOID           | GO-term                                                                         | Frequency          |                        | P-value  |
|-----|----------------|---------------------------------------------------------------------------------|--------------------|------------------------|----------|
|     |                |                                                                                 | Cluster            | Background             |          |
| 2   | 43170          | macromolecule metabolic process                                                 | 41/48 genes, 85.4% | 1417/2464 genes, 57.5% | 0.00254  |
|     | <b>Cluster</b> | 15                                                                              |                    |                        |          |
| 1   | 79             | regulation of cyclin-dependent protein kinase activity                          | 3/12 genes, 25.0%  | 18/2464 genes, 0.7%    | 0.00505  |
| 1   | 43549          | regulation of kinase activity                                                   | 3/12 genes, 25.0%  | 20/2464 genes, 0.8%    | 0.00702  |
| 1   | 45859          | regulation of protein kinase activity                                           | 3/12 genes, 25.0%  | 20/2464 genes, 0.8%    | 0.00702  |
| 1   | 51338          | regulation of transferase activity                                              | 3/12 genes, 25.0%  | 21/2464 genes, 0.9%    | 0.00816  |
|     | <b>Cluster</b> | 16                                                                              |                    |                        |          |
| 1   | 43413          | biopolymer glycosylation                                                        | 7/15 genes, 46.7%  | 53/2464 genes, 2.2%    | 3.76E-07 |
| 1   | 6486           | protein amino acid glycosylation                                                | 7/15 genes, 46.7%  | 53/2464 genes, 2.2%    | 3.76E-07 |
| 1   | 9100           | glycoprotein metabolic process                                                  | 7/15 genes, 46.7%  | 54/2464 genes, 2.2%    | 4.31E-07 |
| 1   | 9101           | glycoprotein biosynthetic process                                               | 7/15 genes, 46.7%  | 54/2464 genes, 2.2%    | 4.31E-07 |
| 1   | 6464           | protein modification process                                                    | 9/15 genes, 60.0%  | 275/2464 genes, 11.2%  | 0.0003   |
| 1   | 43412          | biopolymer modification                                                         | 9/15 genes, 60.0%  | 301/2464 genes, 12.2%  | 0.00065  |
| 1   | 6493           | protein amino acid O-linked glycosylation                                       | 3/15 genes, 20.0%  | 12/2464 genes, 0.5%    | 0.00183  |
| 1   | 6487           | protein amino acid N-linked glycosylation                                       | 4/15 genes, 26.7%  | 41/2464 genes, 1.7%    | 0.00371  |
| 6   | 9059           | macromolecule biosynthetic process                                              | 9/15 genes, 60.0%  | 391/2464 genes, 15.9%  | 0.00563  |
|     | <b>Cluster</b> | 18                                                                              |                    |                        |          |
| 2   | 19941          | modification-dependent protein catabolic process                                | 9/17 genes, 52.9%  | 93/2464 genes, 3.8%    | 1.60E-07 |
| 2   | 51603          | proteolysis involved in cellular protein catabolic process                      | 9/17 genes, 52.9%  | 93/2464 genes, 3.8%    | 1.60E-07 |
| 2   | 6511           | ubiquitin-dependent protein catabolic process                                   | 9/17 genes, 52.9%  | 93/2464 genes, 3.8%    | 1.60E-07 |
| 2   | 43632          | modification-dependent macromolecule catabolic process                          | 9/17 genes, 52.9%  | 96/2464 genes, 3.9%    | 2.13E-07 |
| 2   | 44257          | cellular protein catabolic process                                              | 9/17 genes, 52.9%  | 98/2464 genes, 4.0%    | 2.58E-07 |
| 2   | 30163          | protein catabolic process                                                       | 9/17 genes, 52.9%  | 104/2464 genes, 4.2%   | 4.42E-07 |
| 2   | 6508           | proteolysis                                                                     | 9/17 genes, 52.9%  | 107/2464 genes, 4.3%   | 5.72E-07 |
| 2   | 43285          | biopolymer catabolic process                                                    | 9/17 genes, 52.9%  | 168/2464 genes, 6.8%   | 3.12E-05 |
| 2   | 44265          | cellular macromolecule catabolic process                                        | 9/17 genes, 52.9%  | 182/2464 genes, 7.4%   | 6.25E-05 |
| 2   | 9057           | macromolecule catabolic process                                                 | 9/17 genes, 52.9%  | 203/2464 genes, 8.2%   | 0.00016  |
| 3   | 44248          | cellular catabolic process                                                      | 9/17 genes, 52.9%  | 258/2464 genes, 10.5%  | 0.00121  |
| 3   | 9056           | catabolic process                                                               | 9/17 genes, 52.9%  | 264/2464 genes, 10.7%  | 0.00146  |
|     | <b>Cluster</b> | 19                                                                              |                    |                        |          |
| 6   | 6412           | translation                                                                     | 20/55 genes, 36.4% | 293/2464 genes, 11.9%  | 0.00022  |
| 2   | 8643           | carbohydrate transport                                                          | 6/55 genes, 10.9%  | 25/2464 genes, 1.0%    | 0.0015   |
|     | <b>Cluster</b> | 20                                                                              |                    |                        |          |
| 1   | 19236          | response to pheromone                                                           | 9/16 genes, 56.2%  | 30/2464 genes, 1.2%    | 1.39E-12 |
| 1   | 19953          | sexual reproduction                                                             | 10/16 genes, 62.5% | 48/2464 genes, 1.9%    | 1.76E-12 |
| 1   | 746            | conjugation                                                                     | 10/16 genes, 62.5% | 48/2464 genes, 1.9%    | 1.76E-12 |
| 1   | 747            | conjugation with cellular fusion                                                | 10/16 genes, 62.5% | 48/2464 genes, 1.9%    | 1.76E-12 |
| 1   | 51704          | multi-organism process                                                          | 10/16 genes, 62.5% | 56/2464 genes, 2.3%    | 9.44E-12 |
| 1   | 749            | response to pheromone during conjugation with cellular fusion                   | 7/16 genes, 43.8%  | 24/2464 genes, 1.0%    | 2.83E-09 |
| 1   | 3              | reproduction                                                                    | 11/16 genes, 68.8% | 151/2464 genes, 6.1%   | 8.82E-09 |
| 1   | 31137          | regulation of conjugation with cellular fusion                                  | 5/16 genes, 31.2%  | 10/2464 genes, 0.4%    | 1.17E-07 |
| 1   | 32005          | signal transduction during conjugation with cellular fusion                     | 5/16 genes, 31.2%  | 10/2464 genes, 0.4%    | 1.17E-07 |
| 1   | 46999          | regulation of conjugation                                                       | 5/16 genes, 31.2%  | 10/2464 genes, 0.4%    | 1.17E-07 |
| 1   | 750            | pheromone-dependent signal transduction during conjugation with cellular fusion | 5/16 genes, 31.2%  | 10/2464 genes, 0.4%    | 1.17E-07 |
| 1   | 7186           | G-protein coupled receptor protein signaling pathway                            | 5/16 genes, 31.2%  | 11/2464 genes, 0.4%    | 2.14E-07 |
| 1   | 7166           | cell surface receptor linked signal transduction                                | 5/16 genes, 31.2%  | 15/2464 genes, 0.6%    | 1.37E-06 |
| 1   | 42221          | response to chemical stimulus                                                   | 9/16 genes, 56.2%  | 172/2464 genes, 7.0%   | 1.96E-05 |
| 1   | 50896          | response to stimulus                                                            | 11/16 genes, 68.8% | 406/2464 genes, 16.5%  | 0.00035  |
| 1   | 9968           | negative regulation of signal transduction                                      | 3/16 genes, 18.8%  | 7/2464 genes, 0.3%     | 0.00064  |
| 1   | 7165           | signal transduction                                                             | 6/16 genes, 37.5%  | 87/2464 genes, 3.5%    | 0.00081  |
| 1   | 9966           | regulation of signal transduction                                               | 3/16 genes, 18.8%  | 9/2464 genes, 0.4%     | 0.00151  |
| 2   | 7154           | cell communication                                                              | 6/16 genes, 37.5%  | 107/2464 genes, 4.3%   | 0.00269  |

It continues on next page

Table 1 – continued from previous page

| Rep | GOID           | GO-term                                  | Frequency           |                       | P-value  |
|-----|----------------|------------------------------------------|---------------------|-----------------------|----------|
|     |                |                                          | Cluster             | Background            |          |
| 1   | 50794          | regulation of cellular process           | 10/16 genes, 62.5%  | 436/2464 genes, 17.7% | 0.00649  |
| 1   | 50789          | regulation of biological process         | 10/16 genes, 62.5%  | 446/2464 genes, 18.1% | 0.00796  |
|     | <b>Cluster</b> | 21                                       |                     |                       |          |
| 6   | 6412           | translation                              | 22/67 genes, 32.8%  | 293/2464 genes, 11.9% | 0.00053  |
| 6   | 9059           | macromolecule biosynthetic process       | 24/67 genes, 35.8%  | 391/2464 genes, 15.9% | 0.0058   |
|     | <b>Cluster</b> | 22                                       |                     |                       |          |
| 1   | 255            | allantoin metabolic process              | 5/19 genes, 26.3%   | 7/2464 genes, 0.3%    | 2.34E-08 |
| 1   | 256            | allantoin catabolic process              | 5/19 genes, 26.3%   | 7/2464 genes, 0.3%    | 2.34E-08 |
| 1   | 46700          | heterocycle catabolic process            | 5/19 genes, 26.3%   | 7/2464 genes, 0.3%    | 2.34E-08 |
| 2   | 6807           | nitrogen compound metabolic process      | 12/19 genes, 63.2%  | 189/2464 genes, 7.7%  | 6.77E-08 |
| 1   | 19740          | nitrogen utilization                     | 4/19 genes, 21.1%   | 12/2464 genes, 0.5%   | 8.79E-05 |
| 2   | 9308           | amine metabolic process                  | 8/19 genes, 42.1%   | 175/2464 genes, 7.1%  | 0.00155  |
| 1   | 46483          | heterocycle metabolic process            | 5/19 genes, 26.3%   | 63/2464 genes, 2.6%   | 0.006    |
|     | <b>Cluster</b> | 24                                       |                     |                       |          |
| 1   | 44262          | cellular carbohydrate metabolic process  | 6/11 genes, 54.5%   | 120/2464 genes, 4.9%  | 0.00016  |
| 1   | 5975           | carbohydrate metabolic process           | 6/11 genes, 54.5%   | 130/2464 genes, 5.3%  | 0.00026  |
| 2   | 32787          | monocarboxylic acid metabolic process    | 5/11 genes, 45.5%   | 84/2464 genes, 3.4%   | 0.00058  |
| 2   | 19752          | carboxylic acid metabolic process        | 7/11 genes, 63.6%   | 244/2464 genes, 9.9%  | 0.00072  |
| 2   | 6082           | organic acid metabolic process           | 7/11 genes, 63.6%   | 244/2464 genes, 9.9%  | 0.00072  |
| 1   | 6094           | gluconeogenesis                          | 3/11 genes, 27.3%   | 21/2464 genes, 0.9%   | 0.00304  |
| 1   | 46487          | glyoxylate metabolic process             | 2/11 genes, 18.2%   | 4/2464 genes, 0.2%    | 0.0039   |
| 1   | 6097           | glyoxylate cycle                         | 2/11 genes, 18.2%   | 4/2464 genes, 0.2%    | 0.0039   |
| 1   | 19319          | hexose biosynthetic process              | 3/11 genes, 27.3%   | 23/2464 genes, 0.9%   | 0.00402  |
| 1   | 46364          | monosaccharide biosynthetic process      | 3/11 genes, 27.3%   | 23/2464 genes, 0.9%   | 0.00402  |
| 2   | 46165          | alcohol biosynthetic process             | 3/11 genes, 27.3%   | 25/2464 genes, 1.0%   | 0.0052   |
| 2   | 6090           | pyruvate metabolic process               | 3/11 genes, 27.3%   | 30/2464 genes, 1.2%   | 0.00907  |
|     | <b>Cluster</b> | 25                                       |                     |                       |          |
| 1   | 6096           | glycolysis                               | 15/239 genes, 6.3%  | 19/2464 genes, 0.8%   | 6.60E-10 |
| 1   | 6007           | glucose catabolic process                | 17/239 genes, 7.1%  | 28/2464 genes, 1.1%   | 1.62E-08 |
| 1   | 19320          | hexose catabolic process                 | 17/239 genes, 7.1%  | 30/2464 genes, 1.2%   | 7.58E-08 |
| 1   | 46365          | monosaccharide catabolic process         | 17/239 genes, 7.1%  | 31/2464 genes, 1.3%   | 1.53E-07 |
| 2   | 6066           | alcohol metabolic process                | 31/239 genes, 13.0% | 97/2464 genes, 3.9%   | 2.39E-07 |
| 1   | 46164          | alcohol catabolic process                | 17/239 genes, 7.1%  | 33/2464 genes, 1.3%   | 5.64E-07 |
| 1   | 16052          | carbohydrate catabolic process           | 17/239 genes, 7.1%  | 39/2464 genes, 1.6%   | 1.44E-05 |
| 1   | 44275          | cellular carbohydrate catabolic process  | 17/239 genes, 7.1%  | 39/2464 genes, 1.6%   | 1.44E-05 |
| 1   | 34308          | monohydric alcohol metabolic process     | 7/239 genes, 2.9%   | 7/2464 genes, 0.3%    | 4.30E-05 |
| 1   | 6067           | ethanol metabolic process                | 7/239 genes, 2.9%   | 7/2464 genes, 0.3%    | 4.30E-05 |
| 1   | 19318          | hexose metabolic process                 | 20/239 genes, 8.4%  | 56/2464 genes, 2.3%   | 4.70E-05 |
| 1   | 5996           | monosaccharide metabolic process         | 20/239 genes, 8.4%  | 58/2464 genes, 2.4%   | 9.23E-05 |
| 1   | 6006           | glucose metabolic process                | 18/239 genes, 7.5%  | 49/2464 genes, 2.0%   | 0.00013  |
| 2   | 32787          | monocarboxylic acid metabolic process    | 24/239 genes, 10.0% | 84/2464 genes, 3.4%   | 0.00029  |
| 2   | 6090           | pyruvate metabolic process               | 13/239 genes, 5.4%  | 30/2464 genes, 1.2%   | 0.00075  |
| 1   | 6113           | fermentation                             | 7/239 genes, 2.9%   | 10/2464 genes, 0.4%   | 0.00399  |
| 2   | 46165          | alcohol biosynthetic process             | 11/239 genes, 4.6%  | 25/2464 genes, 1.0%   | 0.0043   |
| 1   | 19655          | glucose catabolic process to ethanol     | 5/239 genes, 2.1%   | 5/2464 genes, 0.2%    | 0.00478  |
| 1   | 19660          | glycolytic fermentation                  | 5/239 genes, 2.1%   | 5/2464 genes, 0.2%    | 0.00478  |
| 1   | 6766           | vitamin metabolic process                | 15/239 genes, 6.3%  | 45/2464 genes, 1.8%   | 0.00572  |
| 1   | 6767           | water-soluble vitamin metabolic process  | 15/239 genes, 6.3%  | 45/2464 genes, 1.8%   | 0.00572  |
|     | <b>Cluster</b> | 26                                       |                     |                       |          |
| 2   | 6457           | protein folding                          | 3/4 genes, 75.0%    | 55/2464 genes, 2.2%   | 0.0005   |
| 1   | 7010           | cytoskeleton organization and biogenesis | 3/4 genes, 75.0%    | 122/2464 genes, 5.0%  | 0.00548  |
|     | <b>Cluster</b> | 28                                       |                     |                       |          |

It continues on next page

Table 1 – continued from previous page

| Rep | GOID           | GO-term                                                                                   | Frequency            |                        | P-value  |
|-----|----------------|-------------------------------------------------------------------------------------------|----------------------|------------------------|----------|
|     |                |                                                                                           | Cluster              | Background             |          |
| 2   | 6457           | protein folding                                                                           | 15/30 genes, 50.0%   | 55/2464 genes, 2.2%    | 3.03E-16 |
| 1   | 6616           | SRP-dependent cotranslational protein targeting to membrane, translocation                | 5/30 genes, 16.7%    | 8/2464 genes, 0.3%     | 1.17E-06 |
| 1   | 42026          | protein refolding                                                                         | 5/30 genes, 16.7%    | 9/2464 genes, 0.4%     | 2.62E-06 |
| 1   | 65002          | intracellular protein transport across a membrane                                         | 5/30 genes, 16.7%    | 12/2464 genes, 0.5%    | 1.60E-05 |
| 2   | 45047          | protein targeting to ER                                                                   | 6/30 genes, 20.0%    | 24/2464 genes, 1.0%    | 2.53E-05 |
| 1   | 6614           | SRP-dependent cotranslational protein targeting to membrane                               | 5/30 genes, 16.7%    | 16/2464 genes, 0.6%    | 8.57E-05 |
| 1   | 6613           | cotranslational protein targeting to membrane                                             | 5/30 genes, 16.7%    | 17/2464 genes, 0.7%    | 0.00012  |
| 5   | 44267          | cellular protein metabolic process                                                        | 22/30 genes, 73.3%   | 756/2464 genes, 30.7%  | 0.00018  |
| 5   | 19538          | protein metabolic process                                                                 | 22/30 genes, 73.3%   | 781/2464 genes, 31.7%  | 0.00034  |
| 5   | 44260          | cellular macromolecule metabolic process                                                  | 22/30 genes, 73.3%   | 786/2464 genes, 31.9%  | 0.00039  |
| 1   | 6612           | protein targeting to membrane                                                             | 5/30 genes, 16.7%    | 29/2464 genes, 1.2%    | 0.00209  |
| 1   | 15031          | protein transport                                                                         | 9/30 genes, 30.0%    | 157/2464 genes, 6.4%   | 0.00705  |
|     | <b>Cluster</b> | <b>30</b>                                                                                 |                      |                        |          |
| 1   | 6888           | ER to Golgi vesicle-mediated transport                                                    | 3/3 genes, 100.0%    | 43/2464 genes, 1.7%    | 6.93E-05 |
| 1   | 48193          | Golgi vesicle transport                                                                   | 3/3 genes, 100.0%    | 93/2464 genes, 3.8%    | 0.00073  |
| 1   | 45045          | secretory pathway                                                                         | 3/3 genes, 100.0%    | 137/2464 genes, 5.6%   | 0.00236  |
| 1   | 32940          | secretion by cell                                                                         | 3/3 genes, 100.0%    | 140/2464 genes, 5.7%   | 0.00252  |
| 1   | 46903          | secretion                                                                                 | 3/3 genes, 100.0%    | 140/2464 genes, 5.7%   | 0.00252  |
| 2   | 16192          | vesicle-mediated transport                                                                | 3/3 genes, 100.0%    | 174/2464 genes, 7.1%   | 0.00485  |
|     | <b>Cluster</b> | <b>31</b>                                                                                 |                      |                        |          |
| 1   | 6696           | ergosterol biosynthetic process                                                           | 5/13 genes, 38.5%    | 22/2464 genes, 0.9%    | 2.44E-06 |
| 1   | 8204           | ergosterol metabolic process                                                              | 5/13 genes, 38.5%    | 22/2464 genes, 0.9%    | 2.44E-06 |
| 1   | 16126          | sterol biosynthetic process                                                               | 5/13 genes, 38.5%    | 23/2464 genes, 0.9%    | 3.11E-06 |
| 1   | 6694           | steroid biosynthetic process                                                              | 5/13 genes, 38.5%    | 23/2464 genes, 0.9%    | 3.11E-06 |
| 1   | 16125          | sterol metabolic process                                                                  | 5/13 genes, 38.5%    | 27/2464 genes, 1.1%    | 7.39E-06 |
| 1   | 8202           | steroid metabolic process                                                                 | 5/13 genes, 38.5%    | 27/2464 genes, 1.1%    | 7.39E-06 |
| 1   | 8610           | lipid biosynthetic process                                                                | 5/13 genes, 38.5%    | 72/2464 genes, 2.9%    | 0.00113  |
| 2   | 6066           | alcohol metabolic process                                                                 | 5/13 genes, 38.5%    | 97/2464 genes, 3.9%    | 0.00487  |
| 1   | 6555           | methionine metabolic process                                                              | 3/13 genes, 23.1%    | 19/2464 genes, 0.8%    | 0.00604  |
|     | <b>Cluster</b> | <b>32</b>                                                                                 |                      |                        |          |
| 3   | 42254          | ribosome biogenesis and assembly                                                          | 55/161 genes, 34.2%  | 145/2464 genes, 5.9%   | 1.11E-28 |
| 3   | 22613          | ribonucleoprotein complex biogenesis and assembly                                         | 63/161 genes, 39.1%  | 197/2464 genes, 8.0%   | 1.44E-28 |
| 1   | 16070          | RNA metabolic process                                                                     | 88/161 genes, 54.7%  | 584/2464 genes, 23.7%  | 6.48E-16 |
| 2   | 6364           | rRNA processing                                                                           | 30/161 genes, 18.6%  | 73/2464 genes, 3.0%    | 2.24E-15 |
| 2   | 16072          | rRNA metabolic process                                                                    | 30/161 genes, 18.6%  | 74/2464 genes, 3.0%    | 3.57E-15 |
| 1   | 6396           | RNA processing                                                                            | 49/161 genes, 30.4%  | 204/2464 genes, 8.3%   | 4.60E-15 |
| 1   | 6139           | nucleobase, nucleoside, nucleotide and nucleic acid metabolic process                     | 102/161 genes, 63.4% | 835/2464 genes, 33.9%  | 1.11E-12 |
| 1   | 42273          | ribosomal large subunit biogenesis and assembly                                           | 15/161 genes, 9.3%   | 32/2464 genes, 1.3%    | 8.18E-08 |
| 4   | 10467          | gene expression                                                                           | 91/161 genes, 56.5%  | 835/2464 genes, 33.9%  | 4.02E-07 |
| 2   | 43283          | biopolymer metabolic process                                                              | 101/161 genes, 62.7% | 1050/2464 genes, 42.6% | 3.68E-05 |
| 2   | 8152           | metabolic process                                                                         | 146/161 genes, 90.7% | 1844/2464 genes, 74.8% | 6.09E-05 |
| 1   | 466            | maturation of 5.8S rRNA from tricistronic rRNA transcript (SSU-rRNA, 5.8S rRNA, LSU-rRNA) | 7/161 genes, 4.3%    | 9/2464 genes, 0.4%     | 6.18E-05 |
| 1   | 9451           | RNA modification                                                                          | 11/161 genes, 6.8%   | 27/2464 genes, 1.1%    | 0.00015  |
| 1   | 6401           | RNA catabolic process                                                                     | 14/161 genes, 8.7%   | 45/2464 genes, 1.8%    | 0.00018  |
| 1   | 460            | maturation of 5.8S rRNA                                                                   | 7/161 genes, 4.3%    | 10/2464 genes, 0.4%    | 0.00019  |
| 1   | 463            | maturation of LSU-rRNA from tricistronic rRNA transcript (SSU-rRNA, 5.8S rRNA, LSU-rRNA)  | 6/161 genes, 3.7%    | 7/2464 genes, 0.3%     | 0.0002   |
| 1   | 470            | maturation of LSU-rRNA                                                                    | 6/161 genes, 3.7%    | 7/2464 genes, 0.3%     | 0.0002   |
| 2   | 44238          | primary metabolic process                                                                 | 138/161 genes, 85.7% | 1713/2464 genes, 69.5% | 0.00032  |
| 1   | 22618          | protein-RNA complex assembly                                                              | 20/161 genes, 12.4%  | 92/2464 genes, 3.7%    | 0.00037  |
| 2   | 44237          | cellular metabolic process                                                                | 142/161 genes, 88.2% | 1798/2464 genes, 73.0% | 0.00046  |

It continues on next page

Table 1 – continued from previous page

| Rep | GOID           | GO-term                                               | Frequency            |                        | P-value  |
|-----|----------------|-------------------------------------------------------|----------------------|------------------------|----------|
|     |                |                                                       | Cluster              | Background             |          |
| 1   | 6996           | organelle organization and biogenesis                 | 75/161 genes, 46.6%  | 727/2464 genes, 29.5%  | 0.00069  |
| 1   | 43094          | metabolic compound salvage                            | 7/161 genes, 4.3%    | 12/2464 genes, 0.5%    | 0.00115  |
| 2   | 16043          | cellular component organization and biogenesis        | 102/161 genes, 63.4% | 1137/2464 genes, 46.1% | 0.00181  |
| 1   | 6400           | tRNA modification                                     | 8/161 genes, 5.0%    | 18/2464 genes, 0.7%    | 0.00299  |
| 1   | 6402           | mRNA catabolic process                                | 11/161 genes, 6.8%   | 35/2464 genes, 1.4%    | 0.00299  |
| 1   | 43101          | purine salvage                                        | 5/161 genes, 3.1%    | 7/2464 genes, 0.3%     | 0.00906  |
| 1   | 65003          | macromolecular complex assembly                       | 31/161 genes, 19.3%  | 223/2464 genes, 9.1%   | 0.00989  |
|     | <b>Cluster</b> | 34                                                    |                      |                        |          |
| 1   | 6979           | response to oxidative stress                          | 3/9 genes, 33.3%     | 31/2464 genes, 1.3%    | 0.00763  |
|     | <b>Cluster</b> | 35                                                    |                      |                        |          |
| 6   | 6412           | translation                                           | 42/64 genes, 65.6%   | 293/2464 genes, 11.9%  | 7.33E-23 |
| 6   | 9059           | macromolecule biosynthetic process                    | 42/64 genes, 65.6%   | 391/2464 genes, 15.9%  | 1.11E-17 |
| 3   | 44249          | cellular biosynthetic process                         | 46/64 genes, 71.9%   | 523/2464 genes, 21.2%  | 1.66E-16 |
| 3   | 9058           | biosynthetic process                                  | 46/64 genes, 71.9%   | 665/2464 genes, 27.0%  | 4.31E-12 |
| 5   | 44267          | cellular protein metabolic process                    | 48/64 genes, 75.0%   | 756/2464 genes, 30.7%  | 1.79E-11 |
| 5   | 19538          | protein metabolic process                             | 48/64 genes, 75.0%   | 781/2464 genes, 31.7%  | 7.15E-11 |
| 5   | 44260          | cellular macromolecule metabolic process              | 48/64 genes, 75.0%   | 786/2464 genes, 31.9%  | 9.36E-11 |
| 4   | 10467          | gene expression                                       | 49/64 genes, 76.6%   | 835/2464 genes, 33.9%  | 1.84E-10 |
| 2   | 43170          | macromolecule metabolic process                       | 56/64 genes, 87.5%   | 1417/2464 genes, 57.5% | 1.52E-05 |
| 2   | 44238          | primary metabolic process                             | 60/64 genes, 93.8%   | 1713/2464 genes, 69.5% | 0.00018  |
| 2   | 44237          | cellular metabolic process                            | 60/64 genes, 93.8%   | 1798/2464 genes, 73.0% | 0.00215  |
| 2   | 8152           | metabolic process                                     | 60/64 genes, 93.8%   | 1844/2464 genes, 74.8% | 0.00767  |
|     | <b>Cluster</b> | 36                                                    |                      |                        |          |
| 2   | 16192          | vesicle-mediated transport                            | 6/11 genes, 54.5%    | 174/2464 genes, 7.1%   | 0.00125  |
|     | <b>Cluster</b> | 39                                                    |                      |                        |          |
| 6   | 6412           | translation                                           | 11/15 genes, 73.3%   | 293/2464 genes, 11.9%  | 2.48E-06 |
| 6   | 9059           | macromolecule biosynthetic process                    | 11/15 genes, 73.3%   | 391/2464 genes, 15.9%  | 5.27E-05 |
| 3   | 44249          | cellular biosynthetic process                         | 12/15 genes, 80.0%   | 523/2464 genes, 21.2%  | 9.07E-05 |
| 4   | 10467          | gene expression                                       | 14/15 genes, 93.3%   | 835/2464 genes, 33.9%  | 0.00013  |
| 3   | 9058           | biosynthetic process                                  | 12/15 genes, 80.0%   | 665/2464 genes, 27.0%  | 0.00136  |
| 5   | 44267          | cellular protein metabolic process                    | 12/15 genes, 80.0%   | 756/2464 genes, 30.7%  | 0.00557  |
| 5   | 19538          | protein metabolic process                             | 12/15 genes, 80.0%   | 781/2464 genes, 31.7%  | 0.00794  |
| 5   | 44260          | cellular macromolecule metabolic process              | 12/15 genes, 80.0%   | 786/2464 genes, 31.9%  | 0.00851  |
|     | <b>Cluster</b> | 42                                                    |                      |                        |          |
| 6   | 6412           | translation                                           | 11/12 genes, 91.7%   | 293/2464 genes, 11.9%  | 1.95E-08 |
| 3   | 44249          | cellular biosynthetic process                         | 12/12 genes, 100.0%  | 523/2464 genes, 21.2%  | 2.42E-07 |
| 6   | 9059           | macromolecule biosynthetic process                    | 11/12 genes, 91.7%   | 391/2464 genes, 15.9%  | 4.69E-07 |
| 3   | 9058           | biosynthetic process                                  | 12/12 genes, 100.0%  | 665/2464 genes, 27.0%  | 4.44E-06 |
| 1   | 6450           | regulation of translational fidelity                  | 3/12 genes, 25.0%    | 10/2464 genes, 0.4%    | 0.00033  |
| 5   | 44267          | cellular protein metabolic process                    | 11/12 genes, 91.7%   | 756/2464 genes, 30.7%  | 0.0006   |
| 5   | 19538          | protein metabolic process                             | 11/12 genes, 91.7%   | 781/2464 genes, 31.7%  | 0.00085  |
| 5   | 44260          | cellular macromolecule metabolic process              | 11/12 genes, 91.7%   | 786/2464 genes, 31.9%  | 0.0009   |
| 4   | 10467          | gene expression                                       | 11/12 genes, 91.7%   | 835/2464 genes, 33.9%  | 0.00172  |
|     | <b>Cluster</b> | 43                                                    |                      |                        |          |
| 3   | 22613          | ribonucleoprotein complex biogenesis and assembly     | 13/17 genes, 76.5%   | 197/2464 genes, 8.0%   | 3.68E-10 |
| 3   | 42254          | ribosome biogenesis and assembly                      | 10/17 genes, 58.8%   | 145/2464 genes, 5.9%   | 2.75E-07 |
| 2   | 6364           | rRNA processing                                       | 7/17 genes, 41.2%    | 73/2464 genes, 3.0%    | 1.26E-05 |
| 2   | 16072          | rRNA metabolic process                                | 7/17 genes, 41.2%    | 74/2464 genes, 3.0%    | 1.39E-05 |
| 2   | 16043          | cellular component organization and biogenesis        | 16/17 genes, 94.1%   | 1137/2464 genes, 46.1% | 0.00212  |
|     | <b>Cluster</b> | 44                                                    |                      |                        |          |
| 1   | 9082           | branched chain family amino acid biosynthetic process | 4/30 genes, 13.3%    | 11/2464 genes, 0.4%    | 0.00055  |
| 1   | 9081           | branched chain family amino acid metabolic process    | 4/30 genes, 13.3%    | 13/2464 genes, 0.5%    | 0.00117  |

It continues on next page

Table 1 – continued from previous page

| Rep | GOID           | GO-term                                              | Frequency          |                       | P-value  |
|-----|----------------|------------------------------------------------------|--------------------|-----------------------|----------|
|     |                |                                                      | Cluster            | Background            |          |
| 3   | 42254          | ribosome biogenesis and assembly                     | 9/30 genes, 30.0%  | 145/2464 genes, 5.9%  | 0.00323  |
| 3   | 22613          | ribonucleoprotein complex biogenesis and assembly    | 10/30 genes, 33.3% | 197/2464 genes, 8.0%  | 0.00612  |
|     | <b>Cluster</b> | 46                                                   |                    |                       |          |
| 1   | 6267           | pre-replicative complex assembly                     | 4/12 genes, 33.3%  | 14/2464 genes, 0.6%   | 1.70E-05 |
| 1   | 84             | S phase of mitotic cell cycle                        | 4/12 genes, 33.3%  | 15/2464 genes, 0.6%   | 2.31E-05 |
| 1   | 51320          | S phase                                              | 4/12 genes, 33.3%  | 17/2464 genes, 0.7%   | 4.01E-05 |
| 1   | 22616          | DNA strand elongation                                | 4/12 genes, 33.3%  | 30/2464 genes, 1.2%   | 0.00045  |
| 1   | 6271           | DNA strand elongation during DNA replication         | 4/12 genes, 33.3%  | 30/2464 genes, 1.2%   | 0.00045  |
| 1   | 6261           | DNA-dependent DNA replication                        | 5/12 genes, 41.7%  | 80/2464 genes, 3.2%   | 0.00114  |
| 2   | 6260           | DNA replication                                      | 5/12 genes, 41.7%  | 96/2464 genes, 3.9%   | 0.00279  |
| 1   | 43623          | cellular protein complex assembly                    | 4/12 genes, 33.3%  | 48/2464 genes, 1.9%   | 0.00303  |
|     | <b>Cluster</b> | 47                                                   |                    |                       |          |
| 1   | 910            | cytokinesis                                          | 7/15 genes, 46.7%  | 64/2464 genes, 2.6%   | 2.18E-06 |
| 1   | 51301          | cell division                                        | 7/15 genes, 46.7%  | 82/2464 genes, 3.3%   | 1.27E-05 |
| 1   | 32506          | cytokinetic process                                  | 5/15 genes, 33.3%  | 55/2464 genes, 2.2%   | 0.00082  |
| 1   | 916            | contractile ring contraction involved in cytokinesis | 2/15 genes, 13.3%  | 3/2464 genes, 0.1%    | 0.00724  |
| 2   | 22402          | cell cycle process                                   | 7/15 genes, 46.7%  | 210/2464 genes, 8.5%  | 0.00737  |
|     | <b>Cluster</b> | 51                                                   |                    |                       |          |
| 1   | 43562          | cellular response to nitrogen levels                 | 4/4 genes, 100.0%  | 5/2464 genes, 0.2%    | 1.14E-10 |
| 1   | 6530           | asparagine catabolic process                         | 4/4 genes, 100.0%  | 5/2464 genes, 0.2%    | 1.14E-10 |
| 1   | 6995           | cellular response to nitrogen starvation             | 4/4 genes, 100.0%  | 5/2464 genes, 0.2%    | 1.14E-10 |
| 1   | 9068           | aspartate family amino acid catabolic process        | 4/4 genes, 100.0%  | 6/2464 genes, 0.2%    | 3.42E-10 |
| 1   | 6528           | asparagine metabolic process                         | 4/4 genes, 100.0%  | 8/2464 genes, 0.3%    | 1.59E-09 |
| 1   | 9065           | glutamine family amino acid catabolic process        | 4/4 genes, 100.0%  | 11/2464 genes, 0.4%   | 7.53E-09 |
| 1   | 42594          | response to starvation                               | 4/4 genes, 100.0%  | 15/2464 genes, 0.6%   | 3.11E-08 |
| 1   | 9267           | cellular response to starvation                      | 4/4 genes, 100.0%  | 15/2464 genes, 0.6%   | 3.11E-08 |
| 1   | 33554          | cellular response to stress                          | 4/4 genes, 100.0%  | 18/2464 genes, 0.7%   | 6.99E-08 |
| 1   | 9063           | amino acid catabolic process                         | 4/4 genes, 100.0%  | 19/2464 genes, 0.8%   | 8.85E-08 |
| 1   | 44270          | nitrogen compound catabolic process                  | 4/4 genes, 100.0%  | 21/2464 genes, 0.9%   | 1.36E-07 |
| 1   | 9310           | amine catabolic process                              | 4/4 genes, 100.0%  | 21/2464 genes, 0.9%   | 1.36E-07 |
| 1   | 31668          | cellular response to extracellular stimulus          | 4/4 genes, 100.0%  | 23/2464 genes, 0.9%   | 2.02E-07 |
| 1   | 31669          | cellular response to nutrient levels                 | 4/4 genes, 100.0%  | 23/2464 genes, 0.9%   | 2.02E-07 |
| 1   | 31667          | response to nutrient levels                          | 4/4 genes, 100.0%  | 24/2464 genes, 1.0%   | 2.42E-07 |
| 1   | 9605           | response to external stimulus                        | 4/4 genes, 100.0%  | 24/2464 genes, 1.0%   | 2.42E-07 |
| 1   | 9991           | response to extracellular stimulus                   | 4/4 genes, 100.0%  | 24/2464 genes, 1.0%   | 2.42E-07 |
| 1   | 51716          | cellular response to stimulus                        | 4/4 genes, 100.0%  | 26/2464 genes, 1.1%   | 3.41E-07 |
| 1   | 9064           | glutamine family amino acid metabolic process        | 4/4 genes, 100.0%  | 38/2464 genes, 1.5%   | 1.68E-06 |
| 1   | 9066           | aspartate family amino acid metabolic process        | 4/4 genes, 100.0%  | 38/2464 genes, 1.5%   | 1.68E-06 |
| 2   | 7154           | cell communication                                   | 4/4 genes, 100.0%  | 107/2464 genes, 4.3%  | 0.00012  |
| 1   | 6520           | amino acid metabolic process                         | 4/4 genes, 100.0%  | 157/2464 genes, 6.4%  | 0.00056  |
| 1   | 6519           | amino acid and derivative metabolic process          | 4/4 genes, 100.0%  | 167/2464 genes, 6.8%  | 0.00071  |
| 2   | 9308           | amine metabolic process                              | 4/4 genes, 100.0%  | 175/2464 genes, 7.1%  | 0.00086  |
| 2   | 6807           | nitrogen compound metabolic process                  | 4/4 genes, 100.0%  | 189/2464 genes, 7.7%  | 0.00118  |
| 2   | 19752          | carboxylic acid metabolic process                    | 4/4 genes, 100.0%  | 244/2464 genes, 9.9%  | 0.00329  |
| 2   | 6082           | organic acid metabolic process                       | 4/4 genes, 100.0%  | 244/2464 genes, 9.9%  | 0.00329  |
| 3   | 44248          | cellular catabolic process                           | 4/4 genes, 100.0%  | 258/2464 genes, 10.5% | 0.00412  |
| 3   | 9056           | catabolic process                                    | 4/4 genes, 100.0%  | 264/2464 genes, 10.7% | 0.00452  |
| 1   | 6950           | response to stress                                   | 4/4 genes, 100.0%  | 282/2464 genes, 11.4% | 0.00589  |
